# Supplementary material for: Distinct signalling dynamics of BMP4 and BMP9 in brown versus white adipocytes
Source: Springer Nature journal article supplement (doi:10.1038/s41598-025-99122-5), 2025-05-08
Supplement: MOESM1 [file 41598_2025_99122_MOESM1_ESM.pdf]

# **Distinct Signaling Dynamics of BMP4 and BMP9 in Brown versus White Adipocytes**

Benjamin Constant<sup>§,1</sup>, Ioannis Kamzolas<sup>§,2,3</sup>, Xudong Yang<sup>1</sup>, Jingxu Guo<sup>1</sup>, Sonia Rodriguez-Fdez<sup>1,2</sup>, Iman Mali<sup>1,2</sup>, Sergio Rodriguez-Cuenca<sup>2</sup>, Evangelia Petsalaki<sup>3</sup>, Antonio Vidal-Puig<sup>§,1,2,\*</sup>, Wei Li<sup>§,1,\*</sup>

Supplementary Figure 1. **Time course signalling assays.**

Supplementary Figure 2. **A summary of the GSEA analysis of BMP4 and BMP9 regulated DEGs in white adipocytes.**

Supplementary Figure 3. **EnrichR analysis of DEGs from BMP4- and BMP9- treated brown and white adipocytes.**

Supplementary Figure 4. **In brown adipocytes, BMP4 and BMP9 do not induce significant changes in the expression of TGF- $\beta$  family receptor.**

Supplementary Figure 5. **Uncropped blot images for Supplementary Figure 1.**

Supplementary Table 1. **Primers for the RT-qPCR analysis.**

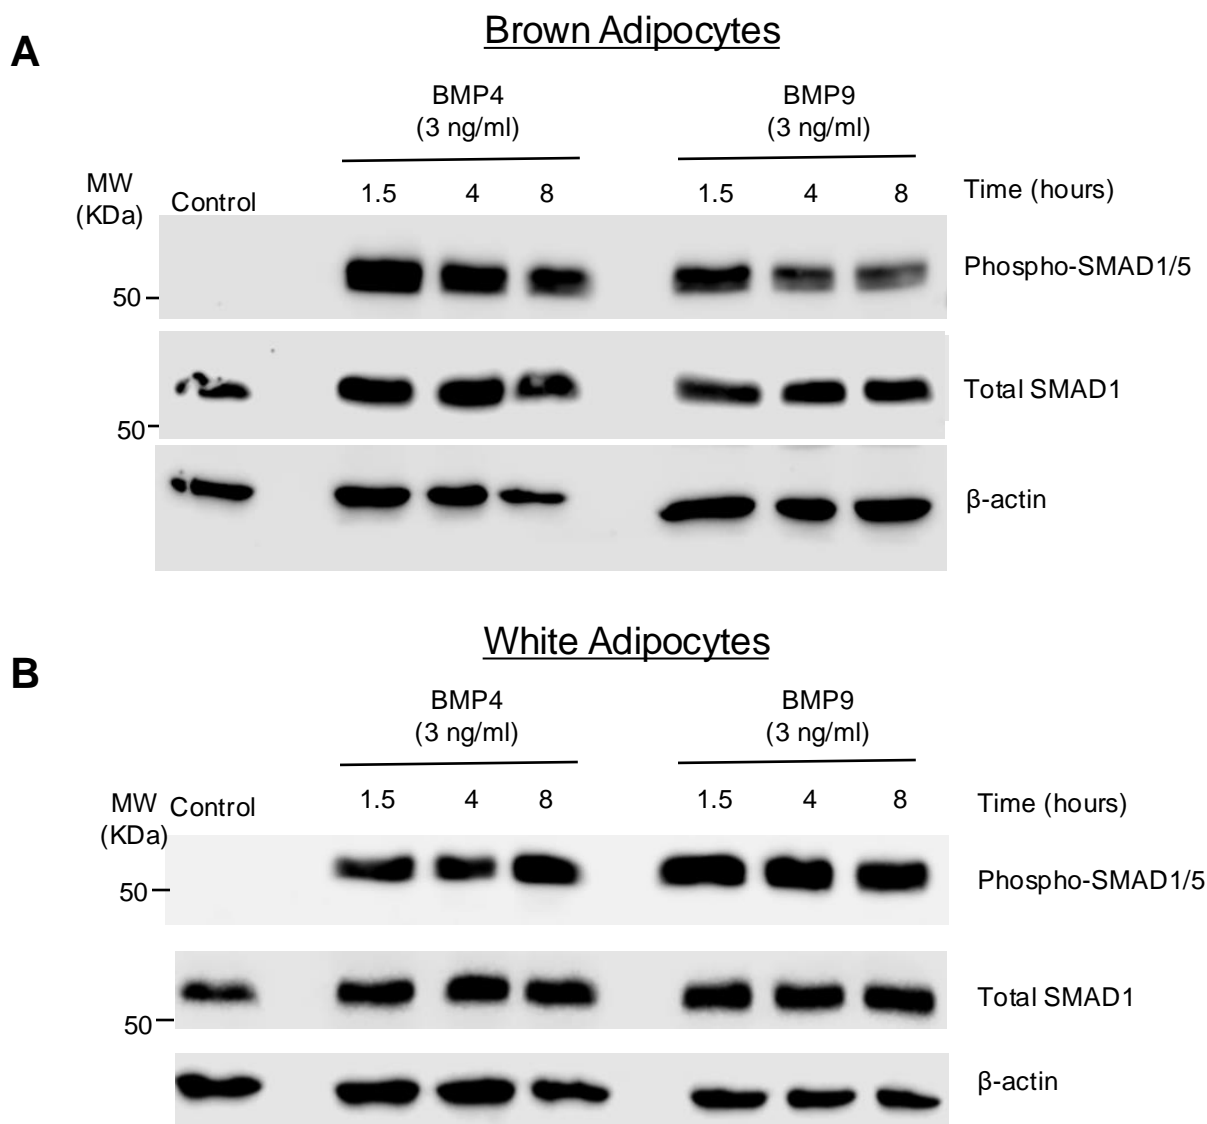

**Supplementary Figure 1. Time course signalling assays.** Mature brown and white adipocytes were treated with BMP4 or BMP9 for the indicated length of time, and Smad1/5 phosphorylation were measured by immunoblotting. An identical gel was run for total Smad1 immunoblot.  $\beta$ -actin was used as a loading control. Original blots/gels are presented in Supplementary Figure 5.

|      |                 | Gene<br>Ontology<br>(GO) | KEGG | Reactome |
|------|-----------------|--------------------------|------|----------|
| BMP4 | Up-regulated    | 165                      | 39   | 28       |
|      | Down- regulated | 19                       | 10   | 2        |
| BMP9 | Up-regulated    | 98                       | 15   | 69       |
|      | Down-regulated  | 8                        | 5    | 4        |

**Supplementary Figure 2. A summary of the GSEA analysis of BMP4 and BMP9 regulated DEGs in white adipocytes.** Number of up- and down-regulated terms with adjusted P-values smaller than 0.05.

**A**

|    | Number of terms with AdjP <0.05          | GO Biological process | GO Cellular component | GO Molecular function | KEGG |
|----|------------------------------------------|-----------------------|-----------------------|-----------------------|------|
| 1  | BMP4, in both brown and white adipocytes | 67                    | none                  | 16                    | 3    |
| 2  | BMP9, in both brown and white adipocytes | 85                    | none                  | 14                    | 3    |
| 3  | BMP4, only in white adipocytes           | 139                   | 4                     | 2                     | 25   |
| 4  | BMP4, only in brown adipocytes           | none                  | 1                     | none                  | 1    |
| 5  | BMP9, only in white adipocytes           | 93                    | 1                     | 8                     | 24   |
| 6  | BMP9, only brown adipocytes              | 4                     | none                  | none                  | 1    |
| 7  | White adipocytes, common in both BMPs    | 177                   | 1                     | 17                    | 23   |
| 8  | White adipocytes, only BMP4              | 5                     | 2                     | none                  | 1    |
| 9  | White adipocytes, only BMP9              | none                  | none                  | none                  | none |
| 10 | Brown adipocytes, common in both BMPs    | 88                    | 1                     | 13                    | 3    |
| 11 | Brown adipocytes, only BMP4              | none                  | none                  | none                  | none |
| 12 | Brown adipocytes, only BMP9              | 12                    | none                  | none                  | 2    |

**B**White adipocytes, only BMP4 (row 8)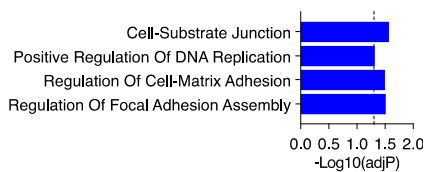**C**Brown adipocytes, only BMP9 (row 12)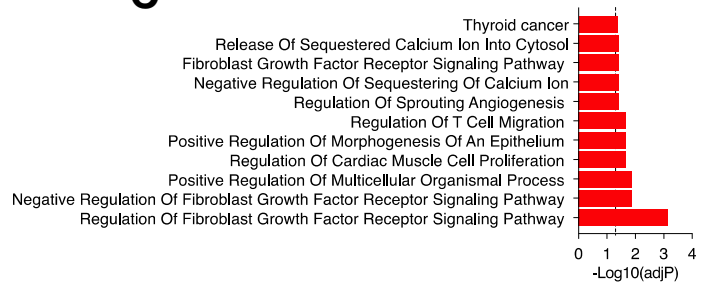

**Supplementary Figure 3. EnrichR analysis of DEGs from BMP4- and BMP9-treated brown and white adipocytes. A.** A summary of total number enriched terms with adjusted P-values smaller than 0.05. **B.** In white adipocytes, significantly enriched pathways can be found for only BMP4 treatment. **C.** In brown adipocytes, significantly enriched pathways can be found only BMP9 treatment.

**A**Brown adipocytes, receptors, BMP4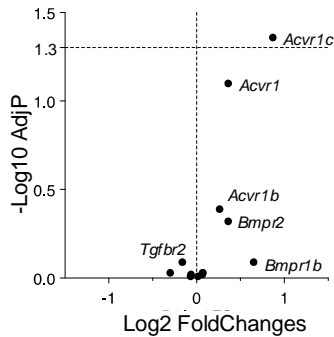**B**Brown adipocytes, receptors, BMP9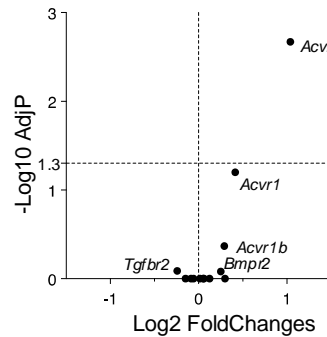**C**RT-qPCR validation of BMP4 and BMP9 signalling in brown adipocytes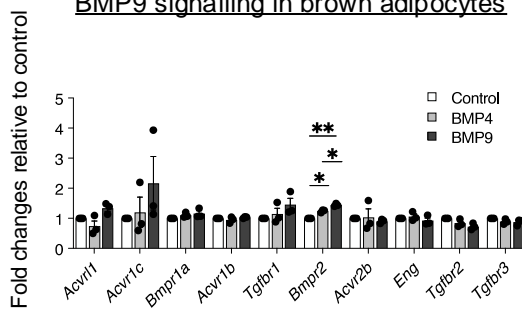

**Supplementary Figure 4. In brown adipocytes, BMP4 and BMP9 do not induce significant changes in the expression of TGF- $\beta$  family receptor. A&B.** Volcano plots of differential gene expressions of TGF- $\beta$  family receptors. A dashed line is drawn at  $Y=1.3$  which indicate where the  $\text{adjP}=0.05$ . Only induction of *Acvr1c* has  $\text{adjP} < 0.05$ . **C.** RT-qPCR validation of receptors changes using three independently differentiated brown and white adipocytes, treated with control or BMPs. Means  $\pm$  SEM are shown. Two-way ANOVA. \*,  $P < 0.05$ , \*\*,  $P < 0.01$ .

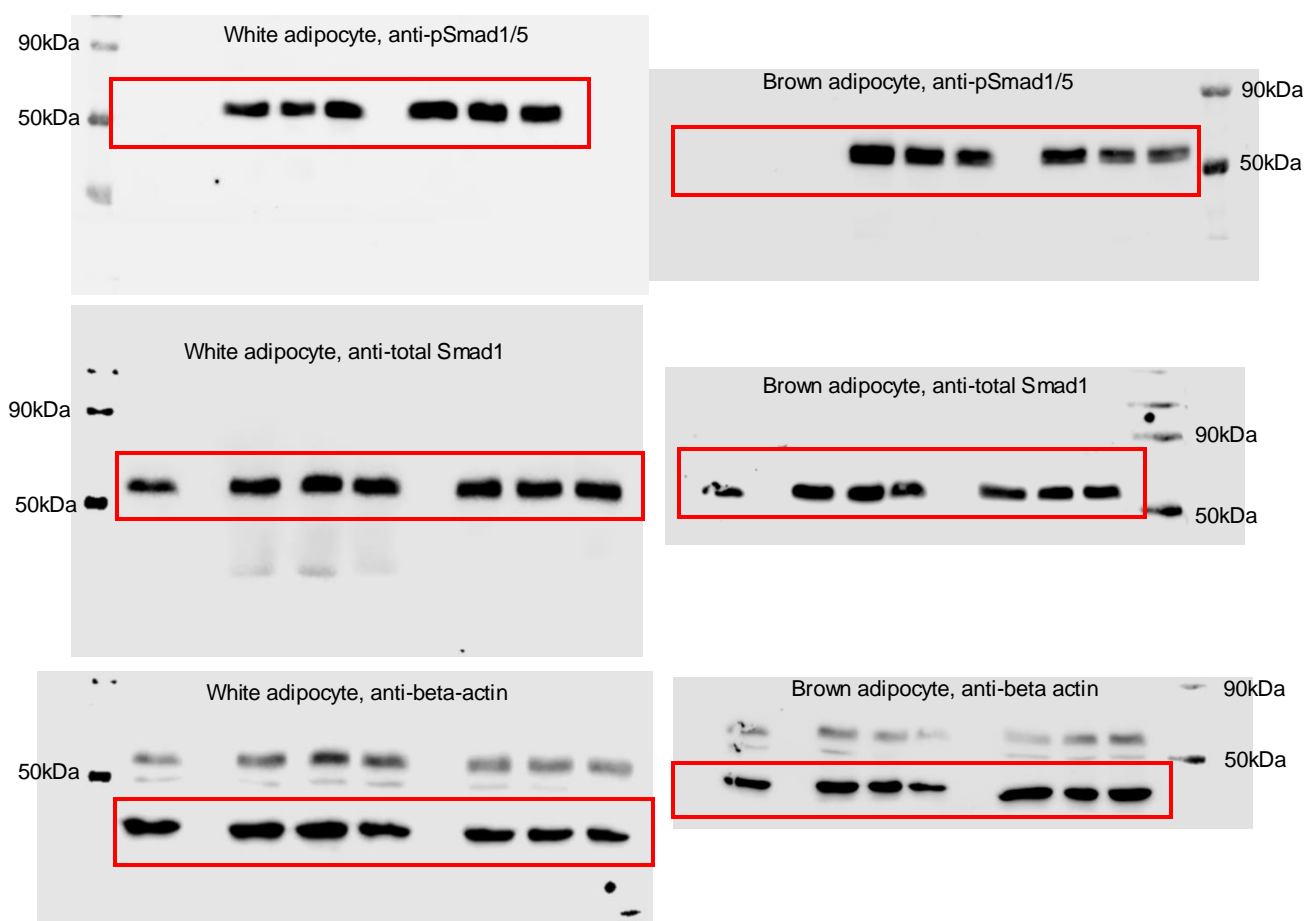

**Supplementary Figure 5. Uncropped blot images for Supplementary Figure 1.**

**Supplementary Table 1. Primers for the RT-qPCR analysis.**

| Gene   | Primer F                  | Primer R                 |
|--------|---------------------------|--------------------------|
| Actb   | GGGAAATCGTGC GTGACAT      | GTGATGACCTGGCCGTCAG      |
| Acvr1  | QuantiTect Primer Assay   | GeneGlobe ID:QT00093422  |
| Acvr1b | QuantiTect Primer Assay   | GeneGlobe ID:QT00163464  |
| Acvr1c | QuantiTect Primer Assay   | GeneGlobe ID: QT00262591 |
| Acvr2a | QuantiTect Primer Assay   | GeneGlobe ID: QT00147602 |
| Acvr2b | QuantiTect Primer Assay   | GeneGlobe ID: QT00109039 |
| Acvr11 | QuantiTect Primer Assay   | GeneGlobe ID: QT00161434 |
| Adipoq | GAGAGAAAAGGAGATGCAGGTCTTC | ACACATAAGCGGCTTCTCCAG    |
| Apln   | AGGCATAGCGTCCTCACCTCTT    | GGTGCAGAAACGACAAAGACGG   |
| B2m    | GTATACTCACGCCACCCACC      | TGGGGGTGAATTCAGTGTGAG    |
| Bmp4   | GCCGAGCCAACACTGTGAGGA     | GATGCTGCTGAGGTTGAAGAGG   |
| Bmpr1a | QuantiTect Primer Assay   | GeneGlobe ID:QT01057511  |
| Bmpr1b | QuantiTect Primer Assay   | GeneGlobe ID: QT00121240 |
| Bmpr2  | QuantiTect Primer Assay   | GeneGlobe ID: QT00251349 |
| Ccn1   | GTGAAGTGCGTCCTTGTGGACA    | CTTGACACTGGAGCATCCTGCA   |
| Ccn2   | TGCGAAGCTGACCTGGAGGAAA    | CCGCAGAACTTAGCCCTGTATG   |
| Cebpa  | TTGCACCTCCACCTACATCC      | CCACAAAGCCCAGAAACCTA     |
| Elovl7 | TCAGTCGCCAAGAGCAATGAGG    | GACATGAAGGAAAGTCACTTGGC  |
| Eng    | CAGCCAAAAGTGTTGGCAATCAGG  | GCTACTCAGGACAAGATGGTCG   |
| Fabp4  | TTCTTTCAAAC TGGGCGTGG     | CGCCTTTCATAACACATTCCACC  |
| Fasn   | TTGGCCTACACCCAGAGCTA      | GTGATAAGGTCCACGGAGGC     |
| Foxp2  | GCATTGGATGACCGAAGCACTG    | TCGCATGTGCAAGTGGGTCATC   |
| Glut4  | ATTGCAGCGCCTGAGTCTTT      | GGTTCCCCATCGTCAGAGC      |
| Hif1a  | CCTGCAC TGAATCAAGAGGTTGC  | CCATCAGAAGGACTTGCTGGCT   |
| Hprt   | CTTCCTCCTCAGACCGCTTT      | ATCGCTAATCACGACGCTGG     |
| Id1    | GCTCACTTTGCGGTTCTGG       | ACGACATGAACGGCTGCTACT    |
| Jarid2 | GCCTGCATAAAGAAGCACCTCAG   | GAGGTCAGTCACTTGCTGCATG   |
| Lipe   | AGAAGGATCGAAGAACCGCAG     | GTGTGAGAACGCTGAGGCTTTG   |
| Pgc1a  | ATGGAGTGACATAGAGTGTGCTG   | TTCCGATTGGTCGCTACACC     |
| Plin1  | AGTGAGTGTGGGGTCCCTTGG     | GACATCCTTACTCTCCACGCTGT  |
| Ppary  | GCCCTTTGGTGACTTTATGG      | CAGCAGGTTGTCTTGATGT      |
| Rassf4 | ACTGAAGAGCCTGGCACTCAAC    | CATCGCTCTTTGTCCGCATAAGC  |
| Syng3  | ACGTGCGCTTTCAGCAGATCAG    | TCGTTGCCACTGATTGGTGAGG   |
| Tead1  | TCCGCTTTCCTTGAACAGCAGAG   | GGGTCACTGTAAGAATGGTTGGC  |
| Tgfβ1  | QuantiTect Primer Assay   | GeneGlobe ID: QT00135828 |
| Tgfβ2  | QuantiTect Primer Assay   | GeneGlobe ID: QT00135646 |
| Tgfβ3  | GGTGTGAAC TGTACCGATCA     | GTTTAGGATGTGAACCTCCCTTG  |
